# Supplementary material for: De novo protein structure prediction using ultra-fast molecular dynamics simulation
Source: PubMed Central journal article supplement (PMC6245515; doi:10.1371/journal.pone.0205819), 2018-11-20
Supplement: pone.0205819.s003.pdf [file pone.0205819.s003.pdf]

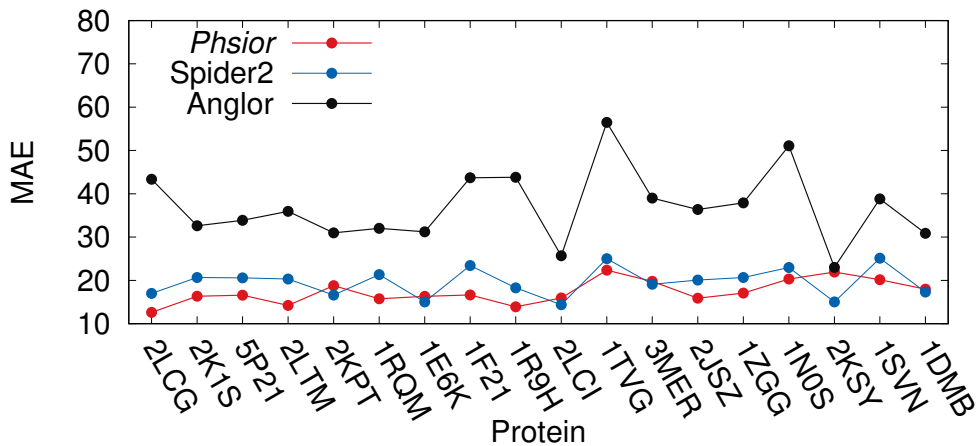

(a)

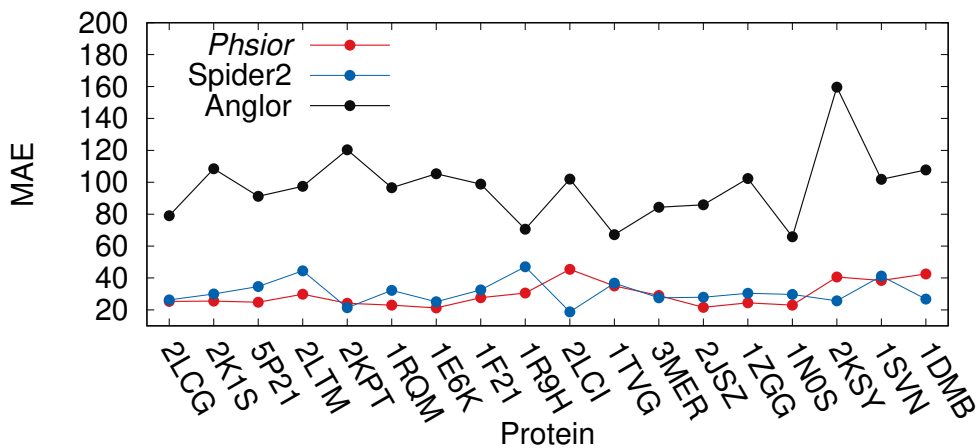

(b)

Figure S2: Comparison on the MAE of the predicted torsion angles ( $\phi$ ,  $\psi$ ) among Anglor, Spider2, and *Phsior*. (a) MAE comparison of  $\phi$ , and (b) MAE comparison of  $\psi$ .
