# Supplementary material for: De novo protein structure prediction using ultra-fast molecular dynamics simulation
Source: PubMed Central journal article supplement (PMC6245515; doi:10.1371/journal.pone.0205819), 2018-11-20
Supplement: pone.0205819.s005.pdf [file pone.0205819.s005.pdf]

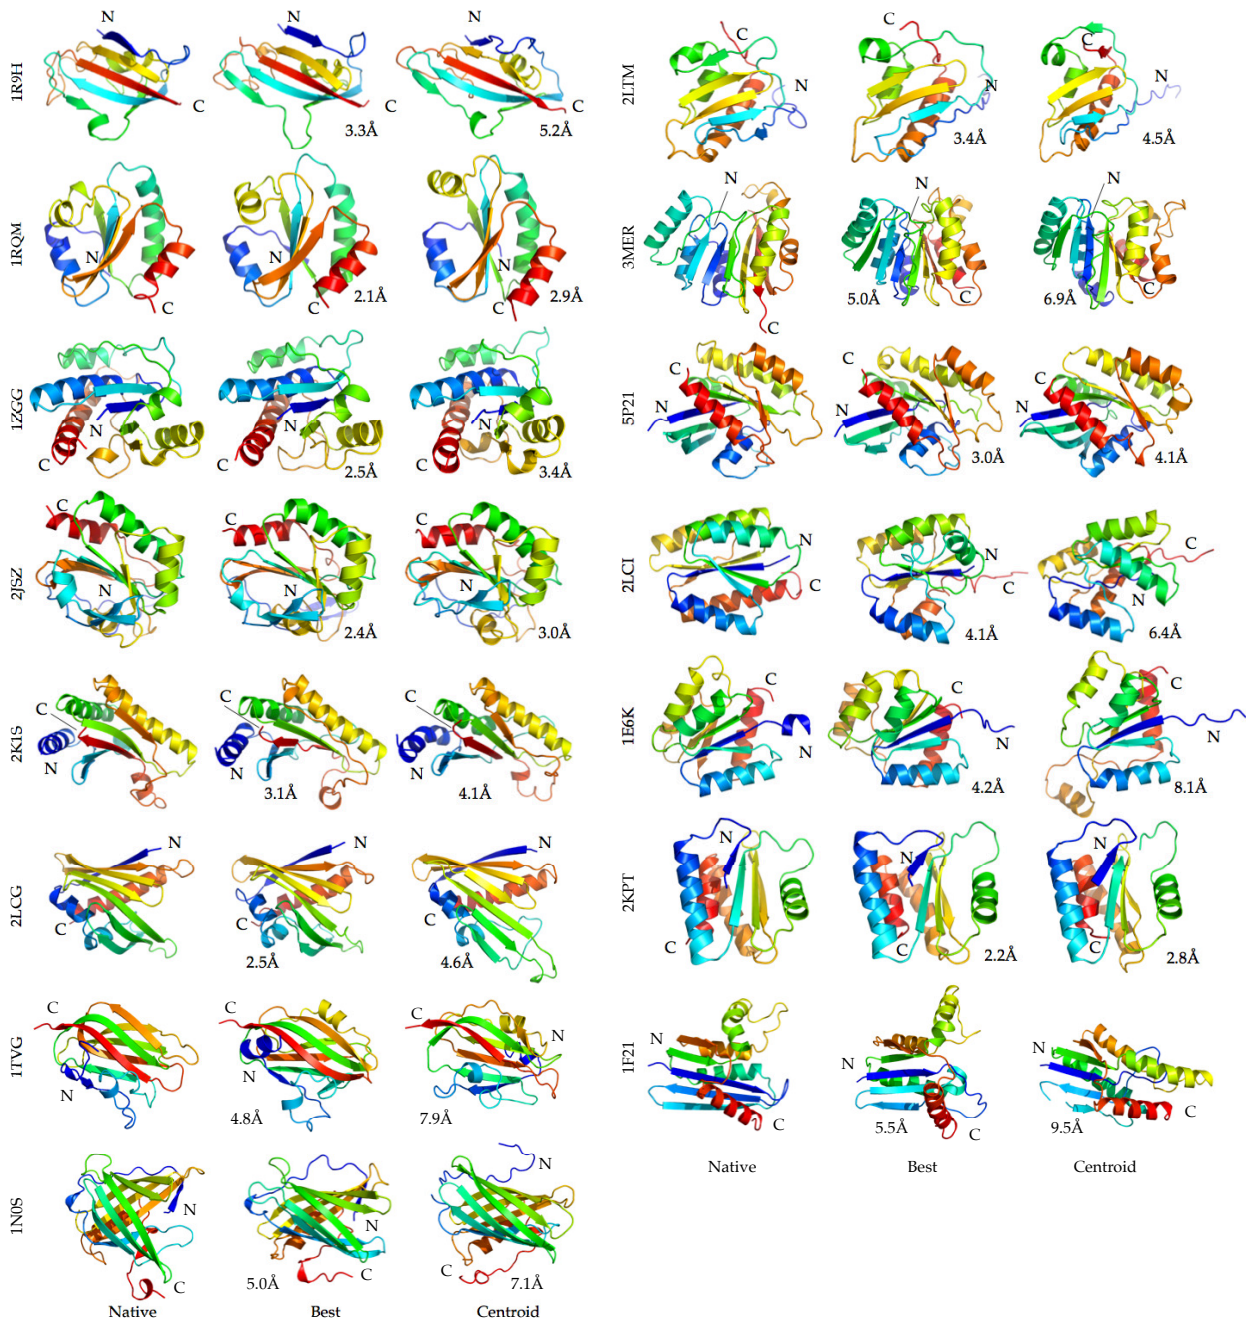

Figure S4: Visual comparisons on the highlighted predicted models of the target proteins.
