# Supplementary material for: De novo protein structure prediction using ultra-fast molecular dynamics simulation
Source: PubMed Central journal article supplement (PMC6245515; doi:10.1371/journal.pone.0205819), 2018-11-20
Supplement: pone.0205819.s006.pdf [file pone.0205819.s006.pdf]

Table S1: The key layers in *Phsior* with convolutional and fully connected layers.

| Layer       | Specification | Specification |
|-------------|---------------|---------------|
| Input       | 35x24x3       | –             |
| Convolution | 5x5x3x16      | ReLU          |
| Max-Pooling | 3x3x3         | Strides=2     |
| Convolution | 1x1x3x32      | ReLU          |
| Convolution | 5x5x3x48      | ReLU          |
| Max-Pooling | 2x2x3         | Strides=2     |
| Softmax     | 4             | Tanh          |
