# Supplementary material for: De novo protein structure prediction using ultra-fast molecular dynamics simulation
Source: PubMed Central journal article supplement (PMC6245515; doi:10.1371/journal.pone.0205819), 2018-11-20
Supplement: pone.0205819.s007.pdf [file pone.0205819.s007.pdf]

Table S2: The comparison of residue-contact (top L/5 and L/2) among metapsicov , NeBcon and plmDCA.

| PDB ID | Top L/5        |            |        | Top L/2        |            |        |
|--------|----------------|------------|--------|----------------|------------|--------|
|        | Metapsicov [5] | NeBcon [6] | plmDCA | Metapsicov [5] | NeBcon [6] | plmDCA |
| 1DMB   | 0.068          | 0.068      | 0.041  | 0.054          | 0.043      | 0.059  |
| 1E6K   | 0.231          | 0.269      | 0.154  | 0.231          | 0.185      | 0.123  |
| 1F21   | 0.000          | 0.000      | 0.000  | 0.000          | 0.056      | 0.014  |
| 1N0S   | 0.029          | 0.000      | 0.029  | 0.070          | 0.000      | 0.081  |
| 1R9H   | 0.000          | 0.000      | 0.000  | 0.000          | 0.000      | 0.000  |
| 1RQM   | 0.238          | 0.286      | 0.238  | 0.231          | 0.250      | 0.154  |
| 1SVN   | 0.057          | 0.057      | 0.075  | 0.030          | 0.030      | 0.052  |
| 1TVG   | 0.000          | 0.000      | 0.000  | 0.000          | 0.000      | 0.000  |
| 1ZGG   | 0.167          | 0.267      | 0.167  | 0.133          | 0.173      | 0.120  |
| 2JSZ   | 0.061          | 0.091      | 0.121  | 0.108          | 0.084      | 0.120  |
| 2K1S   | 0.107          | 0.071      | 0.107  | 0.043          | 0.086      | 0.057  |
| 2KPT   | 0.087          | 0.043      | 0.000  | 0.140          | 0.088      | 0.018  |
| 2KSY   | 0.000          | 0.000      | 0.000  | 0.000          | 0.000      | 0.000  |
| 2LCG   | 0.038          | 0.038      | 0.000  | 0.015          | 0.015      | 0.015  |
| 2LCI   | 0.115          | 0.115      | 0.192  | 0.179          | 0.209      | 0.134  |
| 2LTM   | 0.000          | 0.000      | 0.000  | 0.000          | 0.038      | 0.000  |
| 3MER   | 0.088          | 0.029      | 0.088  | 0.081          | 0.070      | 0.081  |
| 5P21   | 0.000          | 0.000      | 0.030  | 0.024          | 0.060      | 0.012  |
